# Supplementary material for: Essential gene disruptions reveal complex relationships between phenotypic robustness, pleiotropy, and fitness
Source: PubMed Central journal article supplement (PMC4332149; doi:10.15252/msb.20145264), 2015-01-21
Supplement: msb0011-0773-sd5.pdf [file msb0011-0773-sd5.pdf]

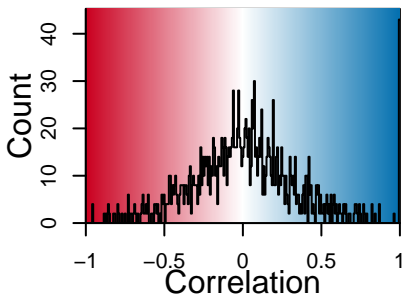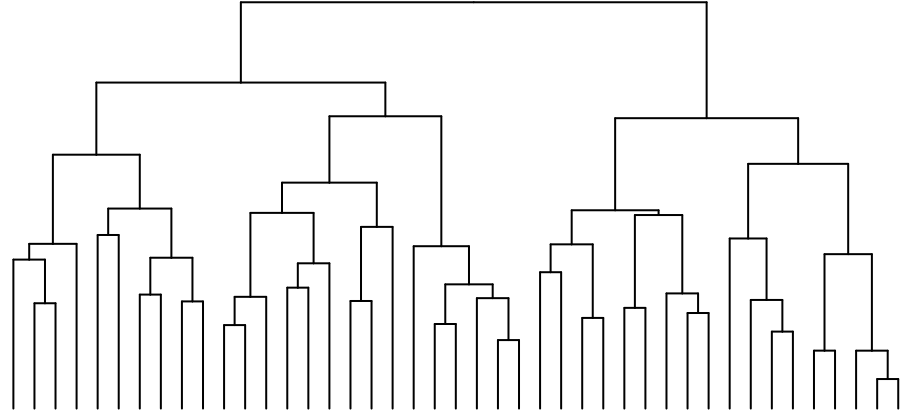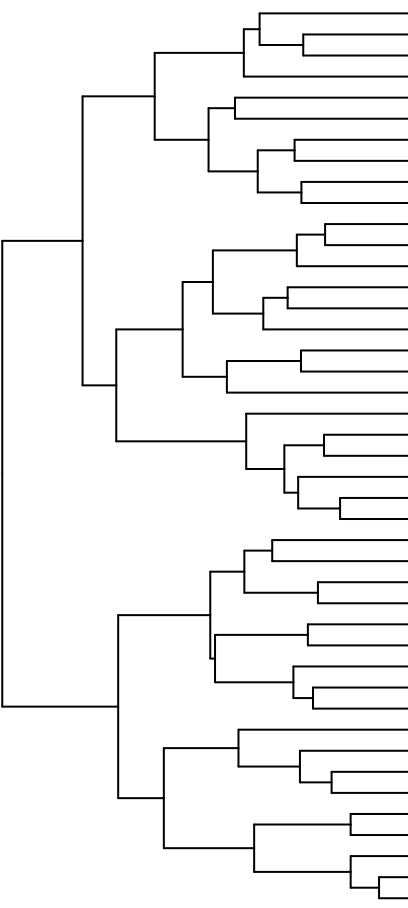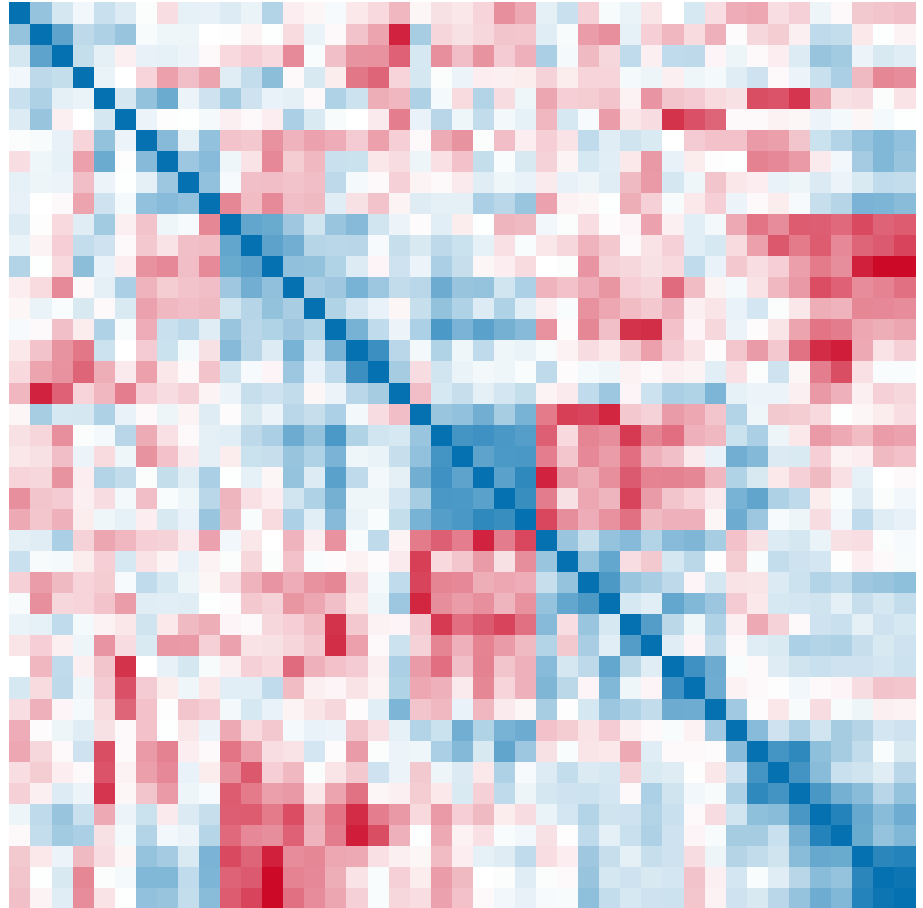

- Comp.10-c
- Comp.14-b
- Comp.15-c
- Comp.3-b
- Comp.5-c
- Comp.13-b
- Comp.7-c
- Comp.5-a
- Comp.2-c
- Comp.6-c
- Comp.8-c
- Comp.4-b
- Comp.1-a
- Comp.18-c
- Comp.16-c
- Comp.8-b
- Comp.3-c
- Comp.2-a
- Comp.19-c
- Comp.8-a
- Comp.17-c
- Comp.10-b
- Comp.7-a
- Comp.7-b
- Comp.12-c
- Comp.9-b
- Comp.13-c
- Comp.14-c
- Comp.12-b
- Comp.11-c
- Comp.6-a
- Comp.9-a
- Comp.20-c
- Comp.11-b
- Comp.9-c
- Comp.4-a
- Comp.4-c
- Comp.6-b
- Comp.3-a
- Comp.5-b
- Comp.2-b
- Comp.1-b
- Comp.1-c

- Comp.10-c
- Comp.14-b
- Comp.15-c
- Comp.3-b
- Comp.5-c
- Comp.13-b
- Comp.7-c
- Comp.5-a
- Comp.2-c
- Comp.6-c
- Comp.8-c
- Comp.4-b
- Comp.1-a
- Comp.18-c
- Comp.16-c
- Comp.8-b
- Comp.3-c
- Comp.2-a
- Comp.19-c
- Comp.8-a
- Comp.17-c
- Comp.10-b
- Comp.7-a
- Comp.7-b
- Comp.12-c
- Comp.9-b
- Comp.13-c
- Comp.14-c
- Comp.12-b
- Comp.11-c
- Comp.6-a
- Comp.9-a
- Comp.20-c
- Comp.11-b
- Comp.9-c
- Comp.4-a
- Comp.4-c
- Comp.6-b
- Comp.3-a
- Comp.5-b
- Comp.2-b
- Comp.1-b
- Comp.1-c
