# Supplementary material for: Essential gene disruptions reveal complex relationships between phenotypic robustness, pleiotropy, and fitness
Source: PubMed Central journal article supplement (PMC4332149; doi:10.15252/msb.20145264), 2015-01-21

# PCA a

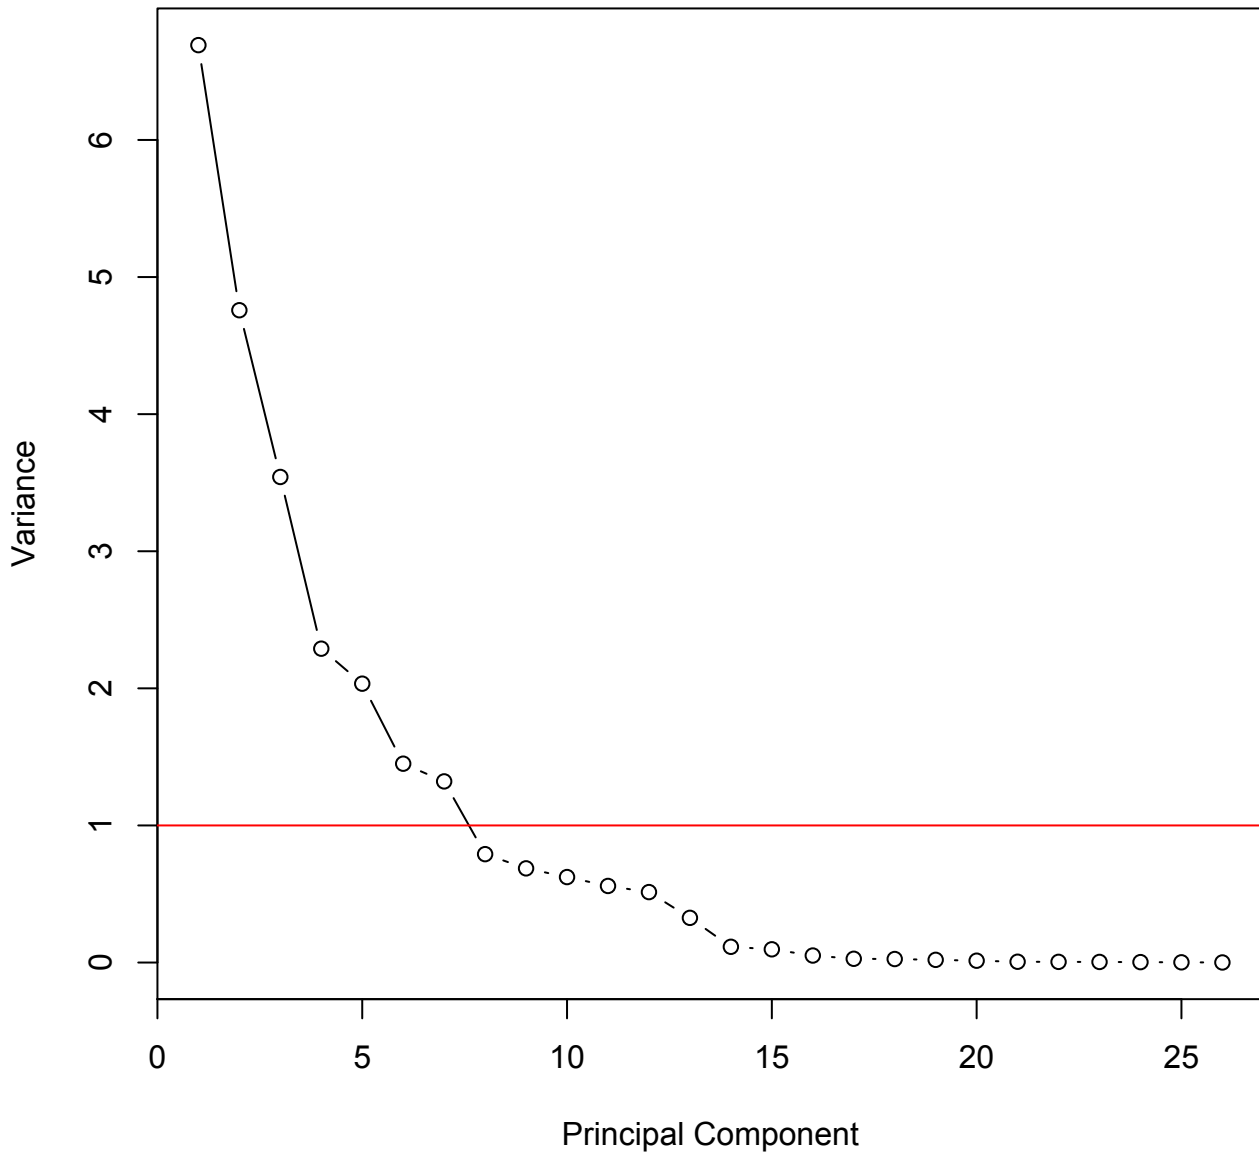

Supplement: msb0011-0773-sd8.pdf [file msb0011-0773-sd8.pdf]
